# Supplementary material for: Controlled synthesis and enhanced electrochemical performance of Prussian blue analogue-derived hollow FeCo2O4 nanospheres as lithium-ion battery anodes
Source: Royal Society of Chemistry journal article supplement (doi:10.1039/c5ra02781k), 2015-01-01
Supplement: c5ra02781k1.pdf [file c5ra02781k1.pdf]

## Supporting information

### Controlled Synthesis and Enhanced Electrochemical Performances of Prussian Blue

#### Analogue-derived Hollow $\text{FeCo}_2\text{O}_4$ Nanospheres as Lithium-ion Battery Anodes

Lei Liu<sup>a</sup>, Zhongbo Hu<sup>a</sup>, Limei Sun<sup>b</sup>, Gui Gao<sup>a</sup>, and Xiangfeng Liu<sup>a\*</sup>

<sup>a</sup> College of Materials Science and Opto-Electronic Technology, University of Chinese

Academy of Sciences, Beijing 100049, China

<sup>b</sup> Department of Nuclear Physics, China Institute of Atomic Energy, Beijing 102413, China

\* Corresponding author: liuxf@ucas.ac.cn

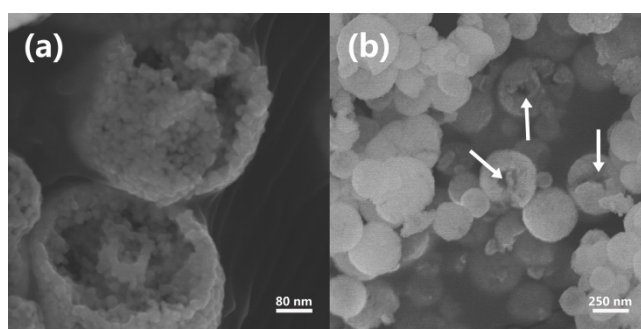

**Figure S1.** SEM images of (a) FCO-NC and (b) FCO-NS with broken shells.
